# Supplementary material for: An isotropic zero thermal expansion alloy with super-high toughness
Source: PubMed Central journal article supplement (PMC10937970; doi:10.1038/s41467-024-46613-0), 2024-03-13
Supplement: 41467_2024_46613_MOESM1_ESM.pdf [file 41467_2024_46613_MOESM1_ESM.pdf]

# SUPPORTING INFORMATION

## **An isotropic zero thermal expansion alloy with super-high toughness**

Chengyi Yu<sup>1</sup>, Kun Lin<sup>1</sup>, Qinghua Zhang<sup>2</sup>, Huihui Zhu<sup>1</sup>, Ke An<sup>3</sup>, Yan Chen<sup>3</sup>, Dunji Yu<sup>3</sup>, Tianyi Li<sup>4</sup>, Xiaoqian Fu<sup>5</sup>, Qian Yu,<sup>5</sup> Li You<sup>1</sup>, Xiaojun Kuang<sup>6</sup>, Yili Cao<sup>1</sup>, Qiang Li<sup>1</sup>, Jinxia Deng<sup>1</sup> and Xianran Xing<sup>1,\*</sup>

<sup>1</sup> Beijing Advanced Innovation Center for Materials Genome Engineering, and Institute of Solid State Chemistry, University of Science and Technology Beijing, Beijing 100083, China.

<sup>2</sup> Institution of Physics, Chinese Academic of Science, No.8, 3rd South Street, Zhongguancun, Haidian District, Beijing, 100190 P. R. China.

<sup>3</sup> Neutron Scattering Division, Oak Ridge National Laboratory, Oak Ridge, TN, USA.

<sup>4</sup> X-Ray Science Division, Argonne National Laboratory, Argonne, IL 60439, USA

<sup>5</sup> Center of Electron Microscopy and State Key Laboratory of Silicon Materials, Department of Materials Science and Engineering, Zhejiang University, Hangzhou, China.

<sup>6</sup> Guangxi Key Laboratory of Electrochemical and Magnetochemical Functional Materials, College of Chemistry and Bioengineering, Guilin University of Technology, Guilin 541004, P. R. China.

\*Corresponding author. Email: *xing@ustb.edu.cn*

# Contents

|                                                                                                                                                                                                                                                                                                       |    |
|-------------------------------------------------------------------------------------------------------------------------------------------------------------------------------------------------------------------------------------------------------------------------------------------------------|----|
| <b>Supplementary Tables</b> .....                                                                                                                                                                                                                                                                     | 3  |
| <b>Supplementary Table 1</b>   The chemical composition of elements of the $\text{LaFe}_{43.5+x}\text{Si}_{2.6+0.06x}$ ( $x = 0, 4, 8, 12, 16$ ) series alloys which were attained by EPMA. ....                                                                                                      | 3  |
| <b>Supplementary Table 2</b>   The chemical composition of elements of the $\text{LaFe}_{0.939x}\text{Co}_{0.061x}\text{Si}_{0.0583x}$ ( $x = 37.5, 47.5, 57. \text{ and } 67.5$ , labeled as S-1, S-2, S-3, and S-4, respectively) series alloys which were attained by EPMA. ....                   | 4  |
| <b>Supplementary Table 3</b>   The summary of ultimate strength ( $\delta_{\text{US}}$ , MPa) and strain ( $\epsilon_f$ , %) in typical ZTE materials. ....                                                                                                                                           | 5  |
| <b>Supplementary Figures</b> .....                                                                                                                                                                                                                                                                    | 6  |
| <b>Supplementary Fig. 1</b>   The calculation of $\text{Si}_L/\text{Si}_\alpha$ and $\text{Fe}_L/\text{Fe}_\alpha$ partition coefficient in La-Fe-Si ternary system. ....                                                                                                                             | 6  |
| <b>Supplementary Fig. 2</b>   The calculation of $\text{Si}_L/\text{Si}_\alpha$ , $\text{Fe}_L/\text{Fe}_\alpha$ and $\text{Co}_L/\text{Co}_\alpha$ partition coefficient. ....                                                                                                                       | 7  |
| <b>Supplementary Fig. 3</b>   Schematic diagram of the relationship between ingot and coordinate system. ....                                                                                                                                                                                         | 8  |
| <b>Supplementary Fig. 4</b>   The cyclic thermal shock experiment undergoes a thermal shock from 77 K to 373 K. ....                                                                                                                                                                                  | 9  |
| <b>Supplementary Fig. 5</b>   The Rietveld refinement of synchrotron X-ray diffraction profile of the as-cast samples in composition $\text{LaFe}_{0.939x}\text{Co}_{0.061x}\text{Si}_{0.0583x}$ ( $x = 37.5, 47.5, 57.5, \text{ and } 67.5$ , labeled as S-1, S-2, S-3, and S-4, respectively). .... | 10 |
| <b>Supplementary Fig. 6</b>   The typical diffraction ( $hkl$ ) reflections of the dual-phase alloy. ....                                                                                                                                                                                             | 11 |
| <b>Supplementary Fig. 7</b>   The microstructure and inverse pole figure (IPFZ) of S-3 alloy. ....                                                                                                                                                                                                    | 12 |
| <b>Supplementary Fig. 8</b>   The electro-probe micro-analyzer (EPMA) mappings of the S-3. ....                                                                                                                                                                                                       | 13 |
| <b>Supplementary Fig. 9</b>   The interface structure of the S-3 alloy. ....                                                                                                                                                                                                                          | 14 |
| <b>Supplementary Fig. 10</b>   Mechanical performance and small parts. ....                                                                                                                                                                                                                           | 15 |
| <b>Supplementary Fig. 11</b>   Schematic diagram of the in-situ neutron diffraction experimental set-up from the top view. ....                                                                                                                                                                       | 16 |
| <b>Supplementary Fig. 12</b>   The compressive stress-strain curves of the pure L phase ( $\text{LaFe}_{10.30}\text{Co}_{0.83}\text{Si}_{1.87}$ ) and $\alpha$ phase ( $\text{Fe}_{92.42}\text{Co}_{4.34}\text{Si}_{3.07}$ ). ....                                                                    | 17 |
| <b>Supplementary Fig. 13</b>   Microstructure evolution of the dual-phase alloy (ZTE composition). ....                                                                                                                                                                                               | 18 |
| <b>Supplementary Fig. 14</b>   Microstructure evolution of the dual-phase alloy (ZTE composition). ....                                                                                                                                                                                               | 19 |
| <b>Supplementary Fig. 15</b>   The evolution of stacking fault illustrated by the crystal structure. ....                                                                                                                                                                                             | 20 |
| <b>Supplementary Fig. 16</b>   Dual-phase interface structures at 15% strain ( $\epsilon$ ). ....                                                                                                                                                                                                     | 21 |
| <b>Supplementary Fig. 17</b>   Fracture morphology of the S-3 and pure $\text{La}(\text{Fe}, \text{Co}, \text{Si})_{13}$ compound, dense and cross stripes demonstrated the large plastic deformation before failure. ....                                                                            | 22 |
| <b>Supplementary Fig. 18</b>   A typical interface of the dual-phase alloy (ZTE composition) at 15 % strain ( $\epsilon$ ). ....                                                                                                                                                                      | 23 |
| <b>References</b> .....                                                                                                                                                                                                                                                                               | 24 |

## Supplementary Tables

**Supplementary Table 1 | The chemical composition of elements of the  $\text{LaFe}_{43.5+x}\text{Si}_{2.6+0.06x}$  ( $x = 0, 4, 8, 12, 16$ ) series alloys which were attained by EPMA.**

| Compositions                         | $\alpha$ Phase, elements |        |       | L Phase, elements |        |        | Partition coefficient          |                                |
|--------------------------------------|--------------------------|--------|-------|-------------------|--------|--------|--------------------------------|--------------------------------|
|                                      | atom%                    |        |       | atom%             |        |        | $\text{Si}_L/\text{Si}_\alpha$ | $\text{Fe}_L/\text{Fe}_\alpha$ |
|                                      | Si                       | Fe     | La    | Si                | Fe     | La     |                                |                                |
| $\text{LaFe}_{43.5}\text{Si}_{2.6}$  | 3.162                    | 96.733 | 0.104 | 11.731            | 82.457 | 5.812  | 3.709                          | 0.852 <sup>①</sup>             |
|                                      | 3.159                    | 96.649 | 0.191 | 11.834            | 82.398 | 5.769  | 3.746                          | 0.852 <sup>②</sup>             |
|                                      | 3.622                    | 96.285 | 0.093 | 12.022            | 82.343 | 5.6345 | 3.319                          | 0.855 <sup>③</sup>             |
| $\text{LaFe}_{47.5}\text{Si}_{2.84}$ | 3.158                    | 96.721 | 0.121 | 11.953            | 82.206 | 5.505  | 3.785                          | 0.850 <sup>①</sup>             |
|                                      | 3.121                    | 96.719 | 0.159 | 11.980            | 82.206 | 5.484  | 3.839                          | 0.850 <sup>②</sup>             |
|                                      | 3.274                    | 96.548 | 0.176 | 11.844            | 82.354 | 5.470  | 3.617                          | 0.853 <sup>③</sup>             |
| $\text{LaFe}_{51.5}\text{Si}_{3.08}$ | 3.719                    | 96.279 | 0.055 | 12.099            | 87.170 | 6.035  | 3.253                          | 0.905 <sup>①</sup>             |
|                                      | 3.737                    | 96.260 | 0.072 | 12.264            | 86.989 | 6.091  | 3.282                          | 0.904 <sup>②</sup>             |
|                                      | 3.766                    | 96.231 | 0.090 | 11.972            | 87.304 | 6.049  | 3.180                          | 0.907 <sup>③</sup>             |
| $\text{LaFe}_{55.5}\text{Si}_{3.32}$ | 4.204                    | 95.132 | 0.663 | 12.940            | 81.403 | 5.656  | 3.078                          | 0.856 <sup>①</sup>             |
|                                      | 4.172                    | 95.714 | 0.113 | 13.159            | 81.181 | 5.658  | 3.154                          | 0.848 <sup>②</sup>             |
|                                      | 4.311                    | 95.570 | 0.119 | 12.512            | 81.769 | 5.719  | 2.902                          | 0.856 <sup>③</sup>             |
| $\text{LaFe}_{59.5}\text{Si}_{3.56}$ | 4.104                    | 95.819 | 0.077 | 12.743            | 81.562 | 5.695  | 3.105                          | 0.851 <sup>①</sup>             |
|                                      | 4.043                    | 95.855 | 0.101 | 12.332            | 82.013 | 5.654  | 3.050                          | 0.856 <sup>②</sup>             |
|                                      | 3.927                    | 96.023 | 0.049 | 12.212            | 82.213 | 5.575  | 3.109                          | 0.856 <sup>③</sup>             |

Average ratio  $\text{Si}_L/\text{Si}_\alpha$ : 3.342;  $\text{Fe}_L/\text{Fe}_\alpha$ : 0.863

Note: ①、②、③ represent that three separate area collections were selected for each sample.

**Supplementary Table 2 | The chemical composition of elements of the  $\text{LaFe}_{0.939x}\text{Co}_{0.061x}\text{Si}_{0.0583x}$  ( $x = 37.5, 47.5, 57.$  and  $67.5$ , labeled as S-1, S-2, S-3, and S-4, respectively) series alloys which were attained by EPMA.**

| Compositions | $\alpha$ Phase, elements |       |        |       | L Phase, elements |        |        |       | Partition coefficient          |                                |                                |
|--------------|--------------------------|-------|--------|-------|-------------------|--------|--------|-------|--------------------------------|--------------------------------|--------------------------------|
|              | atom%                    |       |        |       | atom%             |        |        |       | $\text{Si}_L/\text{Si}_\alpha$ | $\text{Fe}_L/\text{Fe}_\alpha$ | $\text{Co}_L/\text{Co}_\alpha$ |
|              | Co                       | Si    | Fe     | La    | Co                | Si     | Fe     | La    |                                |                                |                                |
| S-1          | 5.281                    | 2.383 | 92.256 | 0.080 | 6.699             | 10.116 | 77.493 | 5.692 | 4.245                          | 0.840                          | 1.268 <sup>①</sup>             |
|              | 5.277                    | 2.476 | 92.157 | 0.090 | 6.639             | 10.089 | 77.904 | 5.368 | 4.075                          | 0.845                          | 1.258 <sup>②</sup>             |
|              | 5.348                    | 2.496 | 92.024 | 0.133 | 6.828             | 10.416 | 77.004 | 5.752 | 4.173                          | 0.837                          | 1.277 <sup>③</sup>             |
| S-2          | 5.431                    | 3.064 | 91.367 | 0.137 | 6.854             | 11.547 | 76.009 | 5.591 | 3.769                          | 0.832                          | 1.262 <sup>①</sup>             |
|              | 5.452                    | 3.140 | 91.256 | 0.152 | 6.981             | 11.517 | 75.853 | 5.65  | 3.668                          | 0.831                          | 1.280 <sup>②</sup>             |
|              | 5.499                    | 3.053 | 91.288 | 0.160 | 6.833             | 10.933 | 76.932 | 5.302 | 3.581                          | 0.843                          | 1.243 <sup>③</sup>             |
| S-3          | 5.452                    | 3.390 | 91.064 | 0.094 | 6.956             | 11.624 | 75.764 | 5.656 | 3.429                          | 0.832                          | 1.276 <sup>①</sup>             |
|              | 5.505                    | 3.307 | 91.100 | 0.088 | 6.682             | 11.019 | 78.044 | 4.255 | 3.332                          | 0.857                          | 1.214 <sup>②</sup>             |
|              | 5.519                    | 3.423 | 90.965 | 0.093 | 6.915             | 11.862 | 75.989 | 5.234 | 3.465                          | 0.835                          | 1.253 <sup>③</sup>             |
| S-4          | 5.616                    | 3.535 | 90.752 | 0.097 | 7.196             | 12.189 | 74.723 | 5.891 | 3.448                          | 0.823                          | 1.281 <sup>①</sup>             |
|              | 5.626                    | 3.551 | 90.759 | 0.064 | 7.047             | 12.428 | 74.994 | 5.531 | 3.500                          | 0.826                          | 1.253 <sup>②</sup>             |
|              | 5.621                    | 3.515 | 90.800 | 0.064 | 7.131             | 12.020 | 75.286 | 5.562 | 3.420                          | 0.829                          | 1.269 <sup>③</sup>             |

Average ratio  $\text{Si}_L/\text{Si}_\alpha$ : 3.675;  $\text{Fe}_L/\text{Fe}_\alpha$ : 0.836;  $\text{Co}_L/\text{Co}_\alpha$ : 1.261

Note: ①、②、③ represent that three separate area collections were selected for each sample.

**Supplementary Table 3 | The summary of ultimate strength ( $\delta_{US}$ , MPa) and strain ( $\epsilon_f$ , %) in typical ZTE materials.**

| Typical ZTE materials                                    | Strain ( $\epsilon_f$ , %) | Ultimate strength ( $\delta_{US}$ , MPa) | References        |
|----------------------------------------------------------|----------------------------|------------------------------------------|-------------------|
| TbCo <sub>1.9</sub> Fe <sub>0.1</sub>                    | 1.5                        | 260                                      | 1                 |
| Ho <sub>2</sub> Fe <sub>16</sub> Cr                      | 2.0                        | 50                                       | 2                 |
| MnCoGe                                                   | 1.0                        | 70.4                                     | 3                 |
| LaFe <sub>11</sub> Si <sub>2</sub> H <sub>x</sub>        | 1.0                        | 60                                       | 4                 |
| Mn <sub>3</sub> Cu <sub>0.5</sub> Ge <sub>0.5</sub> N    | 1.0                        | 161                                      | 5                 |
| Hf <sub>0.87</sub> Ta <sub>0.13</sub> Fe <sub>2</sub>    | 2.7                        | 380                                      | 6                 |
| Mn <sub>3</sub> Ge <sub>0.9</sub> Sn <sub>0.1</sub>      | 5.0                        | 450                                      | 7                 |
| Mn <sub>3</sub> Ge                                       | 5.6                        | 204                                      | 7                 |
| Ho <sub>0.07</sub> Fe <sub>0.93</sub>                    | 5.68                       | 1275.8                                   | 8                 |
| Ho <sub>0.05</sub> Fe <sub>0.95</sub>                    | 8.08                       | 796.8                                    | 8                 |
| Ho <sub>0.04</sub> Fe <sub>0.96</sub>                    | 15.6                       | 878                                      | 8                 |
| GDFC                                                     | 1.2                        | 154                                      | 9                 |
| LaFe <sub>14.2</sub> Co <sub>1.2</sub> Si <sub>1.6</sub> | 3.2                        | 861.1                                    | 10                |
| LaFe <sub>16.2</sub> Co <sub>1.2</sub> Si <sub>1.6</sub> | 3.6                        | 883.6                                    | 10                |
| LaFe <sub>18.2</sub> Co <sub>1.2</sub> Si <sub>1.6</sub> | 3.78                       | 968.8                                    | 10                |
| LaFe <sub>20.2</sub> Co <sub>1.2</sub> Si <sub>1.6</sub> | 3.87                       | 1001.6                                   | 10                |
| LaFe <sub>10.1</sub> Cu <sub>0.5</sub> Si <sub>2.4</sub> | 2.8                        | 1325                                     | 11                |
| LaFe <sub>10.2</sub> Cu <sub>0.4</sub> Si <sub>2.4</sub> | 2.6                        | 1240                                     | 11                |
| La(Fe, Co, Si) <sub>13</sub> /Cu <sub>54.6</sub>         | 12.6                       | 441.1                                    | 12                |
| La(Fe, Co, Si) <sub>13</sub> /Cu <sub>39.7</sub>         | 6.4                        | 360.6                                    | 12                |
| La(Fe, Co, Si) <sub>13</sub> /Cu <sub>25.6</sub>         | 1.9                        | 218.5                                    | 12                |
| La(Fe, Si) <sub>13</sub> /Resin <sub>3</sub>             | 4.2                        | 116.2                                    | 13                |
| La(Fe, Si) <sub>13</sub> /Resin <sub>20</sub>            | 4.1                        | 180.9                                    | 13                |
| La(Fe, Si) <sub>13</sub> /Resin <sub>80</sub>            | 5.3                        | 203.8                                    | 13                |
| Ho <sub>2</sub> Fe <sub>16</sub> Co                      | 2                          | 49                                       | 14                |
| Er-Fe-V-Mo                                               | 2.31                       | 1631.4                                   | 15                |
| La(Fe, Co, Si) <sub>13</sub>                             | 1.6                        | 256.4                                    | 16                |
| S-3                                                      | 30.9                       | 1110.1                                   | This work         |
| Invar                                                    | 30                         | 680.0                                    | $\epsilon = 30\%$ |

## Supplementary Figures

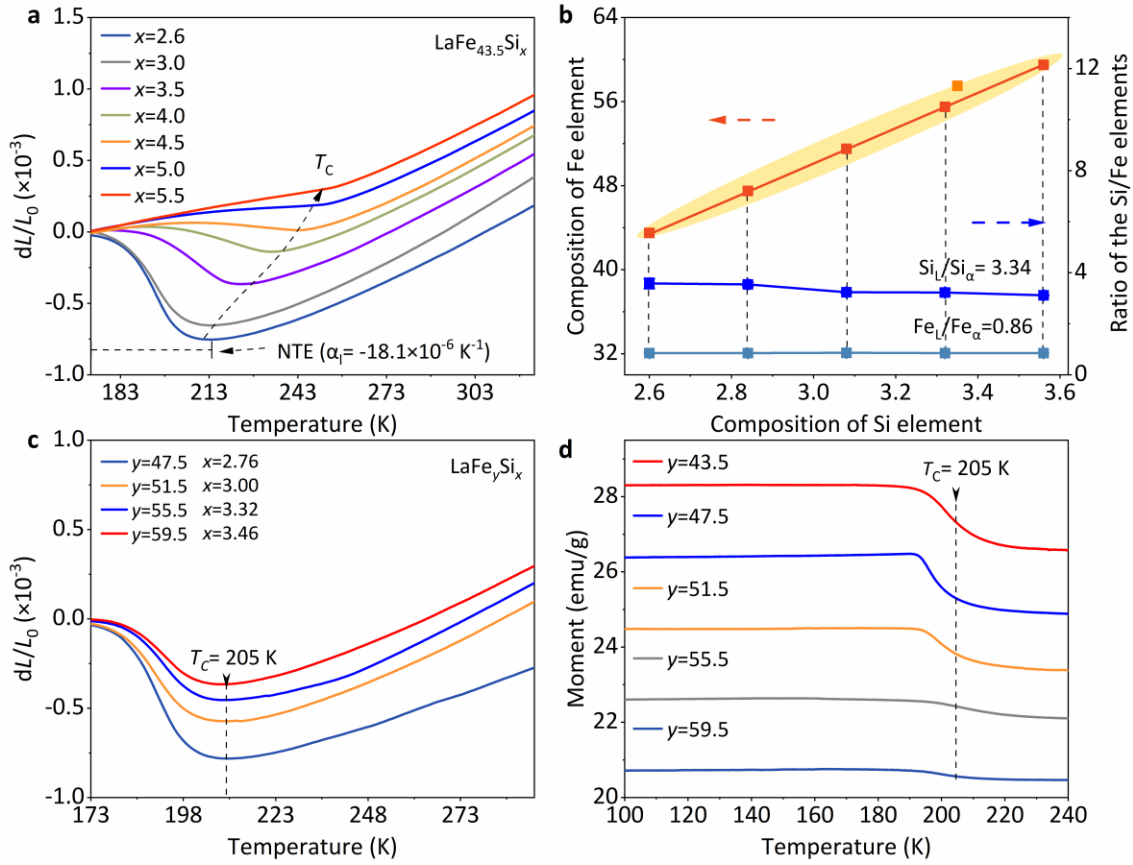

**Supplementary Fig. 1 | The calculation of  $\text{Si}_L/\text{Si}_\alpha$  and  $\text{Fe}_L/\text{Fe}_\alpha$  partition coefficient in La-Fe-Si ternary system.** **a**, The dilatometer thermal expansion of series  $\text{LaFe}_{43.5}\text{Si}_x$  ( $x = 2.6, 3.0, 3.5, 4.0, 4.5, 5.0, 5.5$ ) alloys. **b**, The ratio of  $\text{Si}_L/\text{Si}_\alpha$  and  $\text{Fe}_L/\text{Fe}_\alpha$  in response to different compositions. **c**, The dilatometer thermal expansion of series  $\text{LaFe}_{43.5+x}\text{Si}_{2.6+0.06x}$  ( $x = 0, 4, 8, 12, 16$ ) alloys. **d**, The corresponding magnetic measurements of the series alloys.

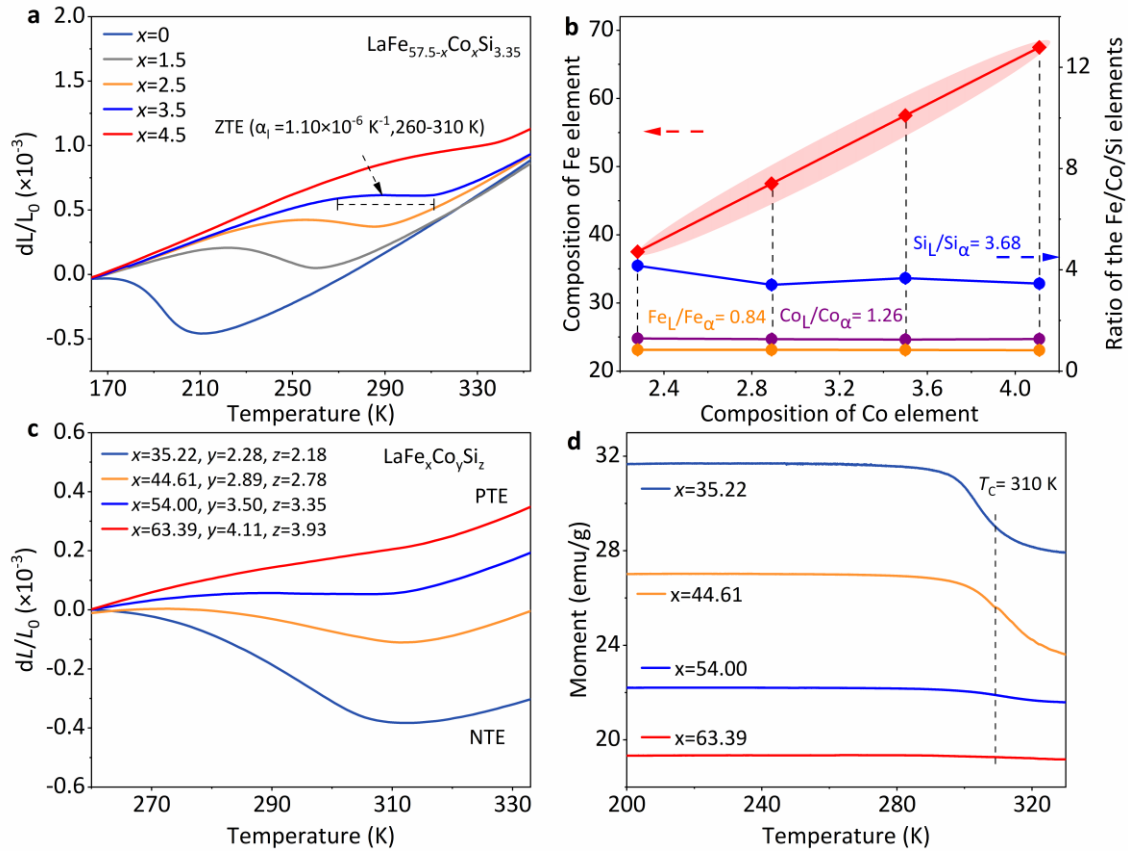

**Supplementary Fig. 2 | The calculation of  $S_{iL}/S_{i\alpha}$ ,  $Fe_L/Fe_\alpha$  and  $Co_L/Co_\alpha$  partition coefficient.**  
**a**, The dilatometer thermal expansion of series  $LaFe_{57.5-x}Co_xSi_{3.35}$  ( $x = 0, 1.5, 2.5, 3.5, 4.5$ ) alloys.  
**b**, The ratio of  $S_{iL}/S_{i\alpha}$ ,  $Fe_L/Fe_\alpha$ , and  $Co_L/Co_\alpha$  in response to different compositions. **c**, The dilatometer thermal expansion of series  $LaFe_xCo_ySi_z$  ( $x = 0, 1.5, 2.5, 3.5, 4.5$ ) alloys. **d**, The corresponding magnetic measurements of the series alloys.

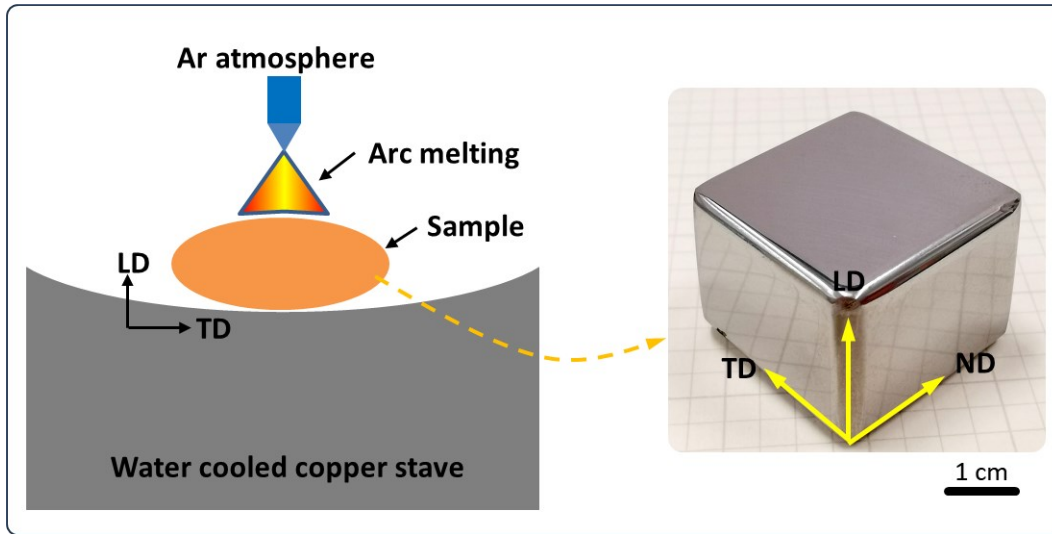

**Supplementary Fig. 3 | Schematic diagram of the relationship between ingot and coordinate system.** The temperature gradient along the LD direction is the reason for the preferential growth of the sample.



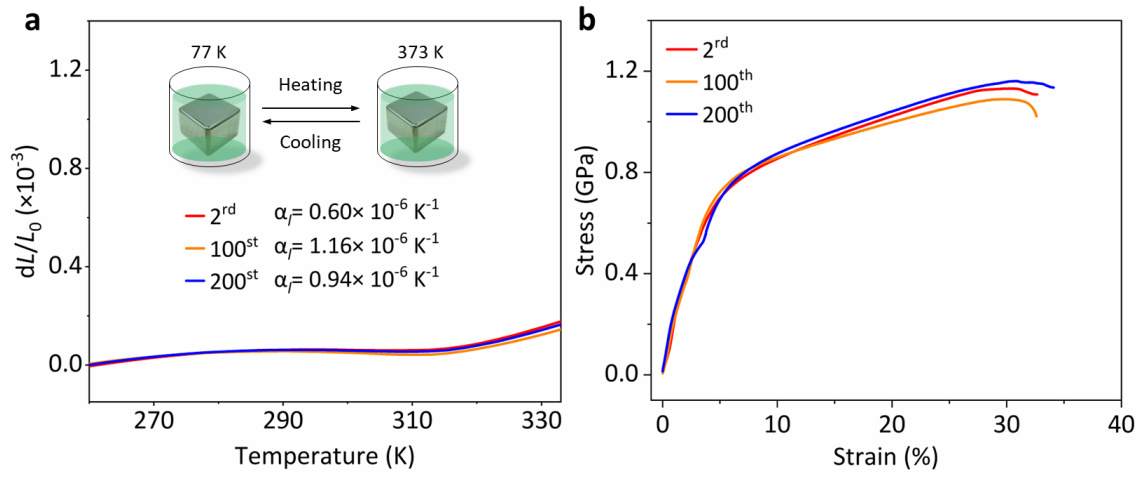

**Supplementary Fig. 4 | The cyclic thermal shock experiment undergoes a thermal shock from 77 K to 373 K. a, The dilatometer thermal expansions of S-3 alloy in the 1<sup>st</sup>, 100<sup>th</sup>, and 200<sup>th</sup> cycles. b, The compressive stress-strain curves of the S-3 alloy after the 1<sup>st</sup>, 100<sup>th</sup>, and 200<sup>th</sup> cycles.**

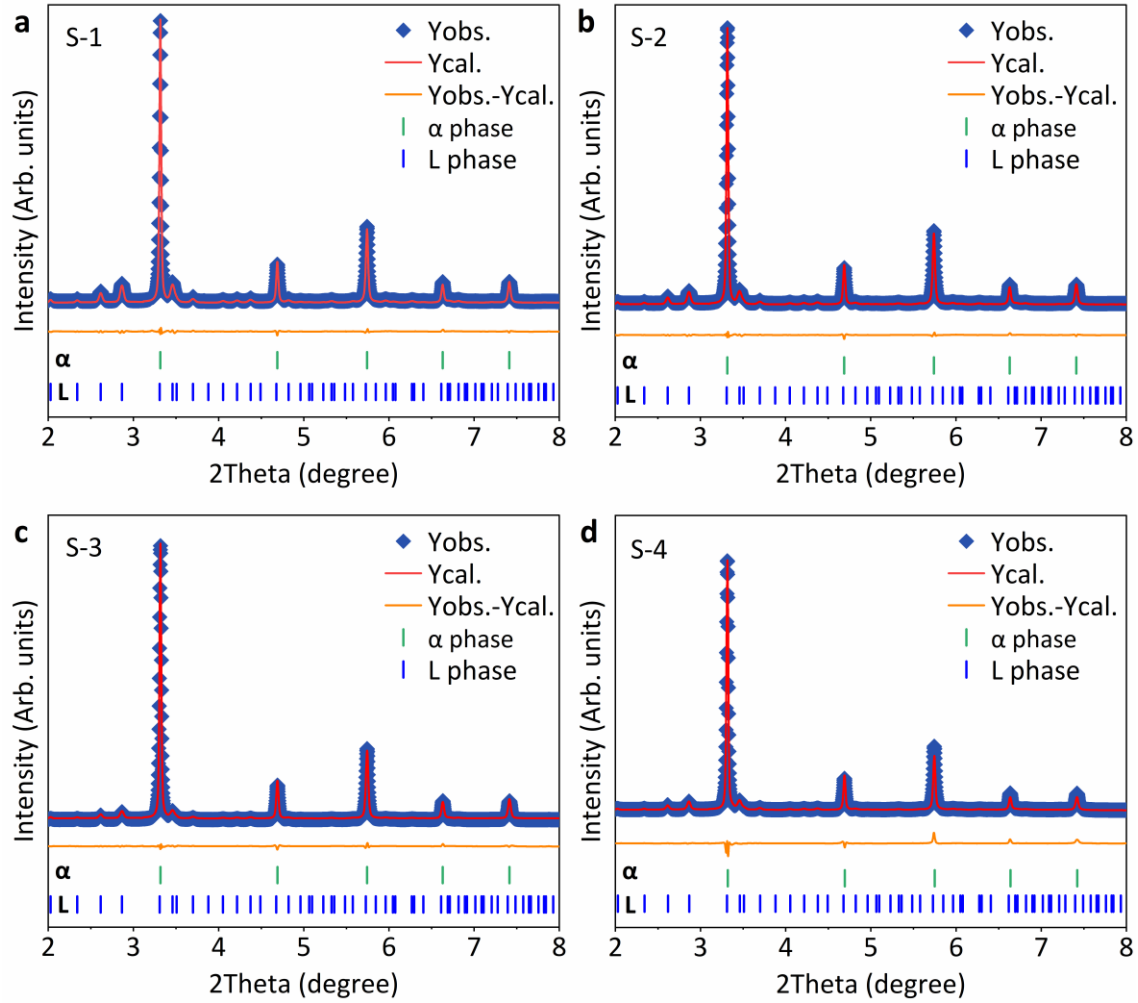

**Supplementary Fig. 5** | a-d, The Rietveld refinement of synchrotron X-ray diffraction profile of the as-cast samples in composition  $\text{LaFe}_{0.939x}\text{Co}_{0.061x}\text{Si}_{10.0583x}$  ( $x = 37.5, 47.5, 57.5, \text{ and } 67.5$ , labeled as S-1, S-2, S-3, and S-4, respectively).

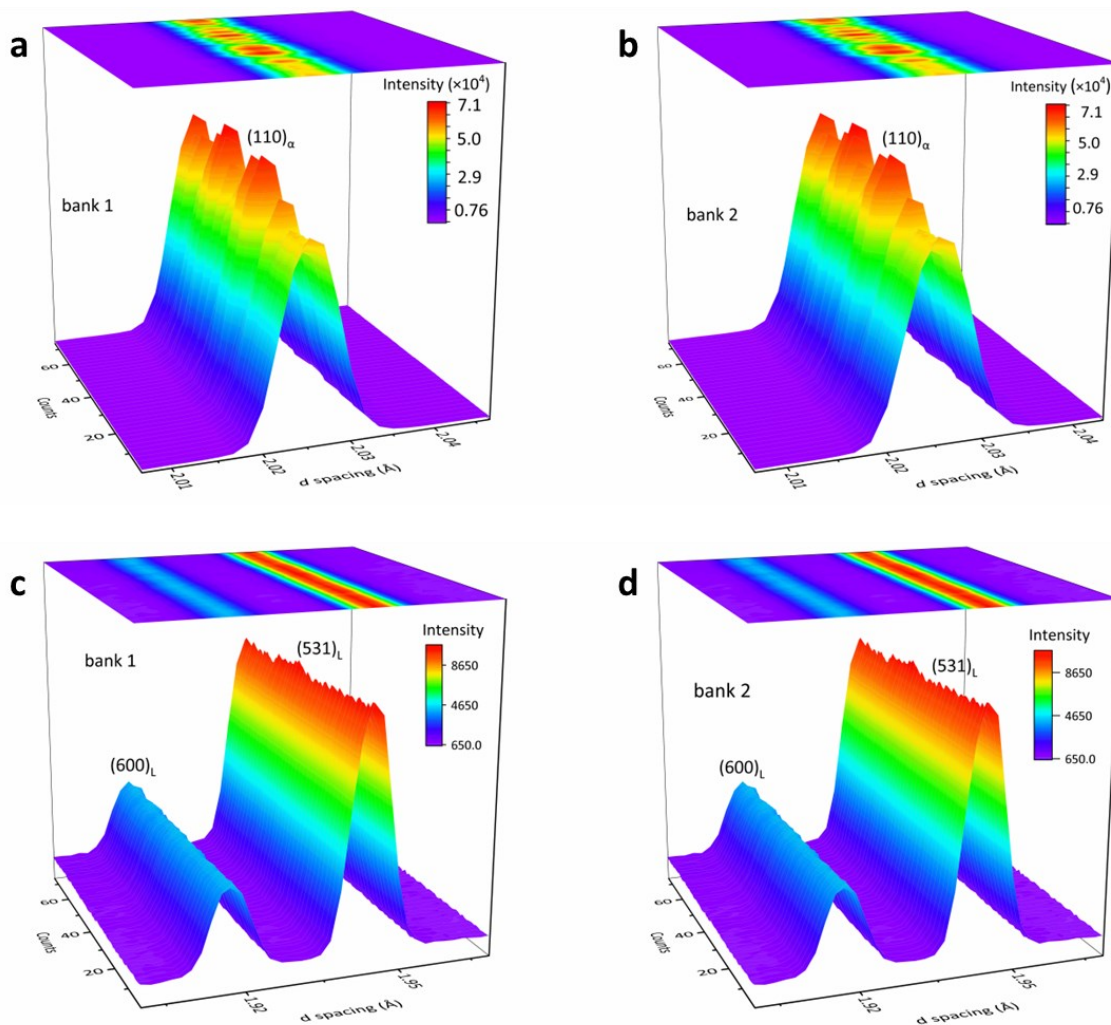

**Supplementary Fig. 6 | The typical diffraction ( $hkl$ ) reflections of the dual-phase alloy. a-b,** The  $(110)_\alpha$  reflection was collected by bank 1 and bank 2 detectors, respectively. **c-d,** The  $(600)_L$  and  $(531)_L$  reflections were collected by bank 1 and bank 2 detectors, respectively. The 75 counts are used to collect the three-dimensional crystallographic information (11.25 degrees/step for 45-degree vertical rotation; 24 degrees/step for 336-degree horizontal rotation). At each step, the two detectors will be collected, respectively.

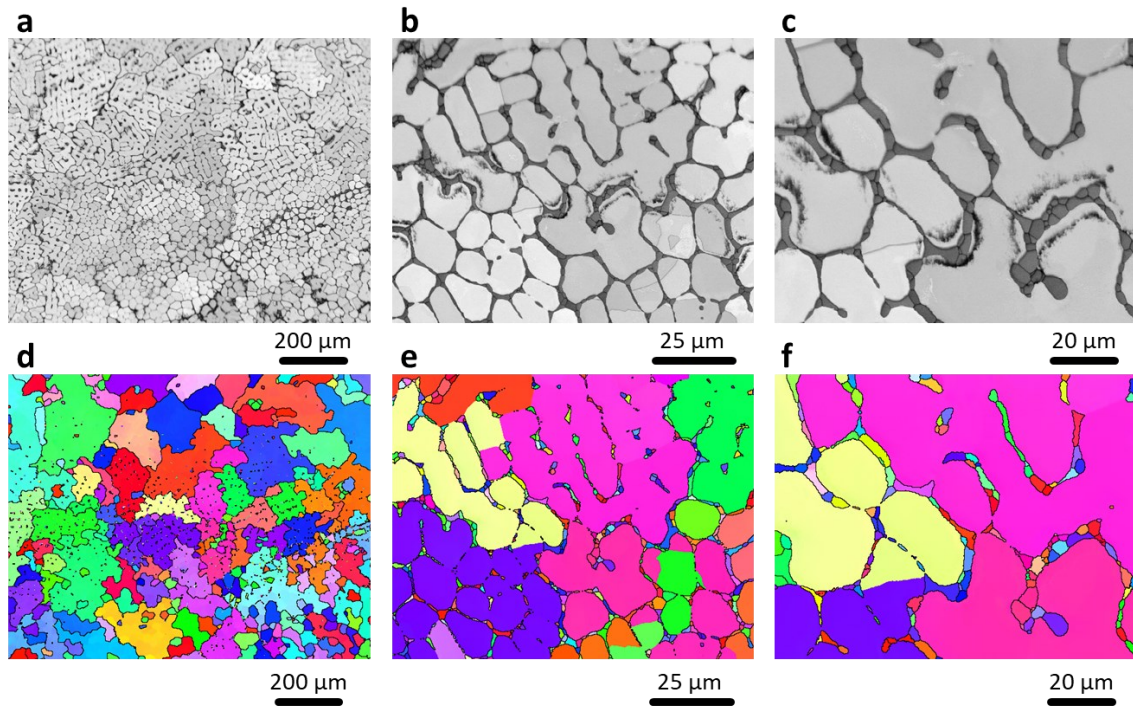

**Supplementary Fig. 7 | The microstructure and inverse pole figure (IPFZ) of S-3 alloy. a-c,** The EBSD band contrast figure at different magnifications. **d-f,** The EBSD inverse pole figure (IPFZ) at different magnifications.

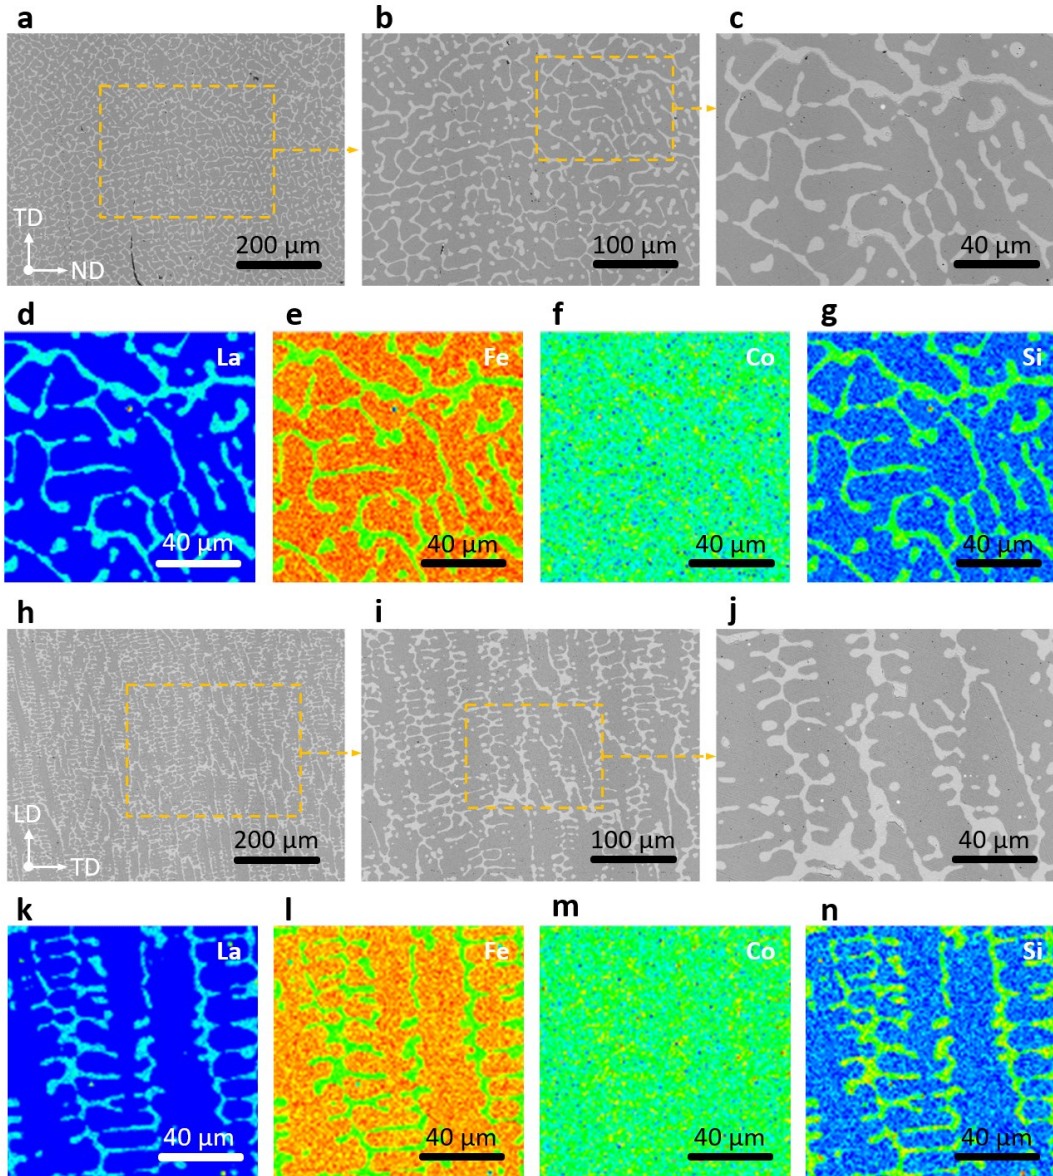

**Supplementary Fig. 8 | The electro-probe micro-analyzer (EPMA) mappings of the S-3. a-c,** The microstructure of S-3 in TD-ND plane at different magnifications. **d-g,** the elements mapping of La, Fe, Co, and Si, respectively. **h-j,** The microstructure of S-3 in LD-TD plane at different magnifications. **k-n,** the elements mapping of La, Fe, Co, and Si, respectively. We observed that there are certain differences in the morphology of the alloy (S-3) between the in-plane (TD-ND) and out-of-plane (LD-TD), the in-plane appearance is a continuous network and the out-of-plane shape is dendritic, which may be related to the growth direction of the as-cast alloy. As a result, the dilatometer thermal expansion behaves a negligible differences.

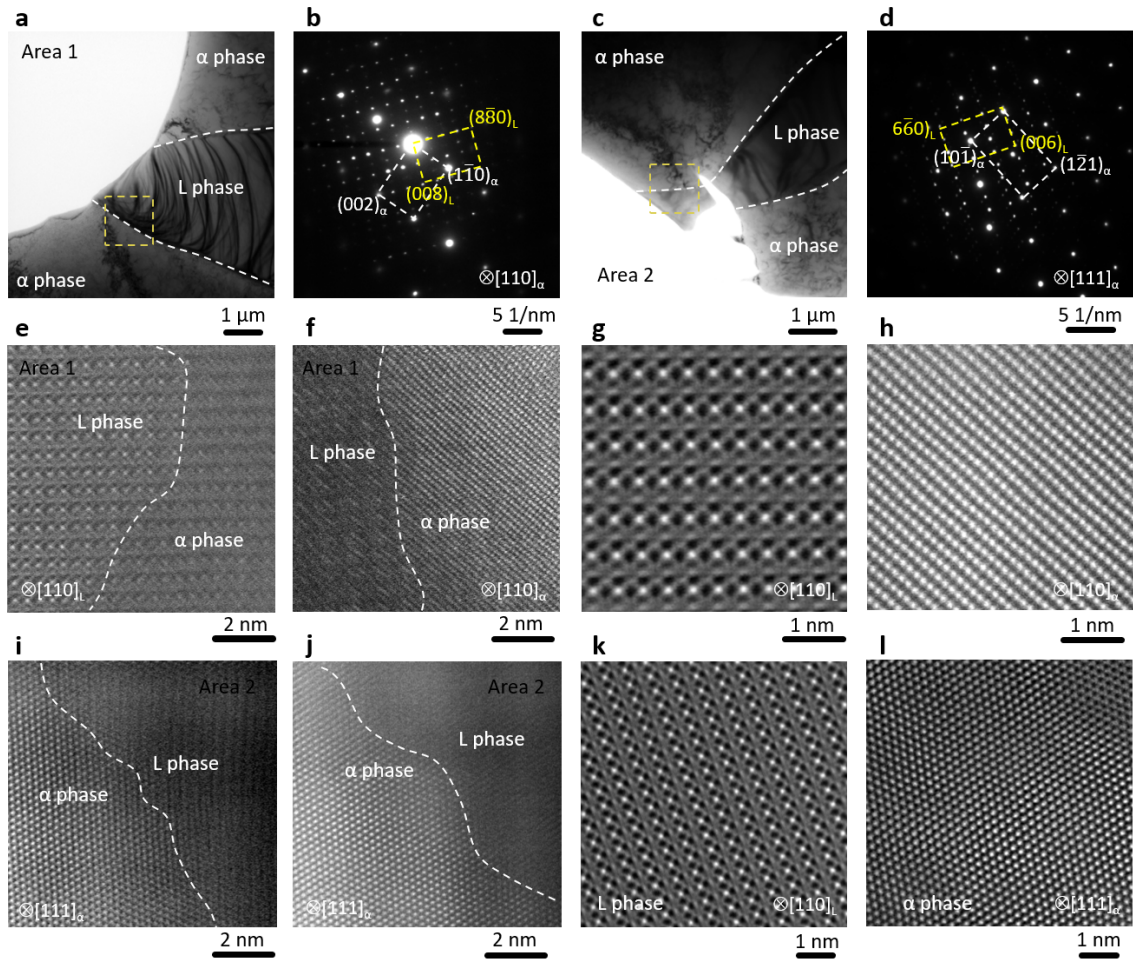

**Supplementary Fig. 9 | The interface structure of the S-3alloy.** a-d, The phase interfaces of the alloy and corresponding selected area electron diffraction (SAED). e-l, The HAADF-STEM images at the phase interface.

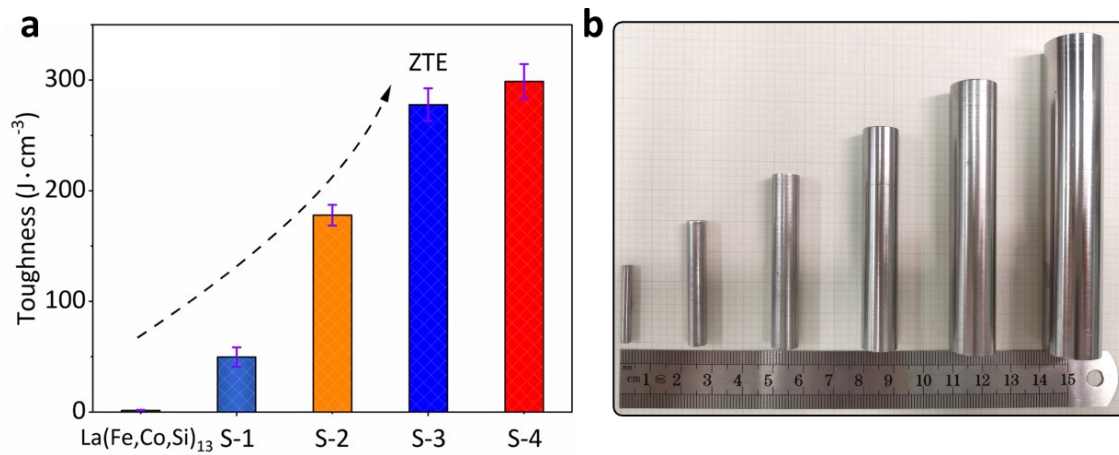

**Supplementary Fig. 10 | Mechanical performance and small parts.** **a**, Toughness comparison of S-1, S-2, S-3, and S-4 series alloys and targeted synthesis of the L phase. **b**, The super-high toughness S-3 alloy is facile and precisely to be machined. The rods/tubes are melted under induction melting conditions and cast into  $\Phi$  25 mm diameter rods, annealed under vacuum (1373 K + 24 hours), then machined to a suitable size and surface polished.

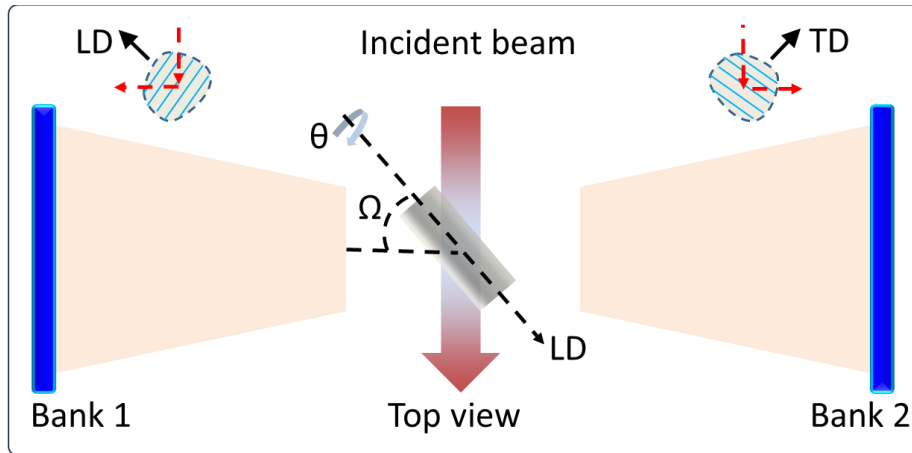

**Supplementary Fig. 11 | Schematic diagram of the in-situ neutron diffraction experimental set-up from the top view.** The sample is horizontal and positioned at  $45^\circ$  from the incident beam such that Bank 1 probes the strain component along the LD, while Bank 2 simultaneously probes the strain component in the TD, as shown in two insets.



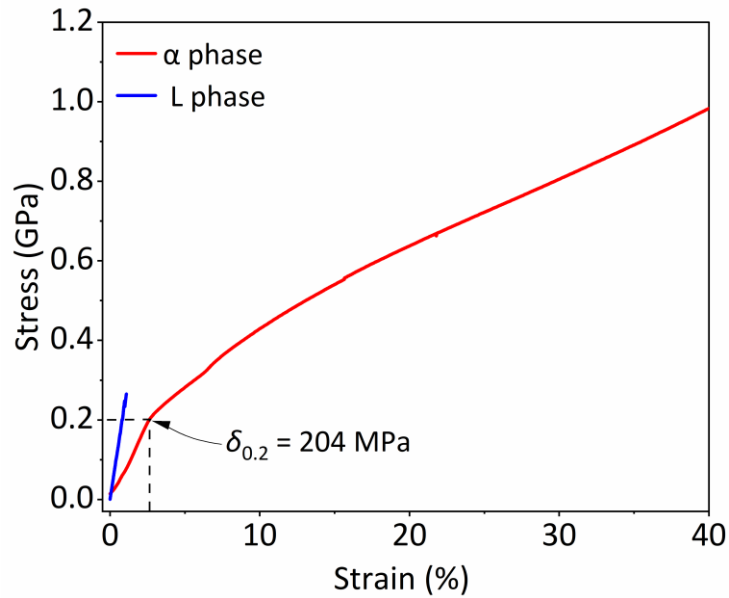

**Supplementary Fig. 12 | The compressive stress-strain curves of the pure L phase ( $\text{LaFe}_{10.30}\text{Co}_{0.83}\text{Si}_{1.87}$ ) and  $\alpha$  phase ( $\text{Fe}_{92.42}\text{Co}_{4.34}\text{Si}_{3.07}$ ). The L phase shows brittle but negative thermal expansion, and the  $\alpha$  phase behaves as plastic and has positive negative thermal expansion.**

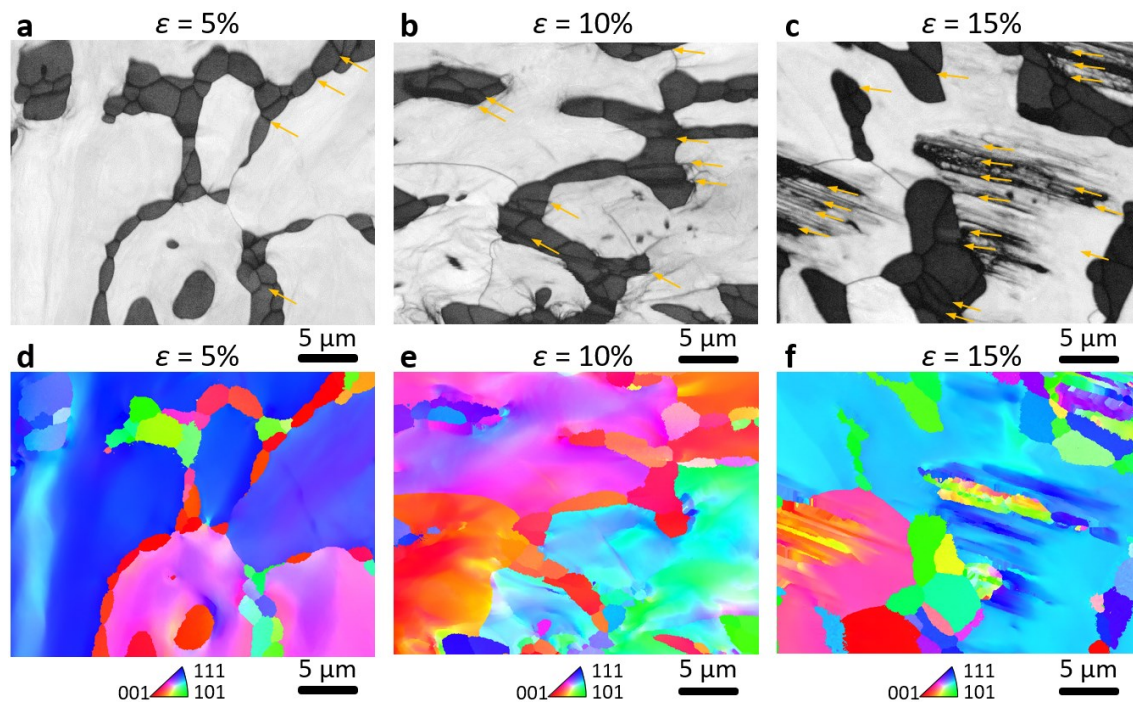

**Supplementary Fig. 13 | Microstructure evolution of the dual-phase alloy (ZTE composition).**  
**a-c**, Ex-situ EBSD phase contrast image under 5%, 10%, 15% strain ( $\epsilon$ ) conditions. Orange arrows represent shear cracks. **d-f**, Ex situ EBSD IPF inverse pole image under 5%, 10%, 15% strain ( $\epsilon$ ) conditions.

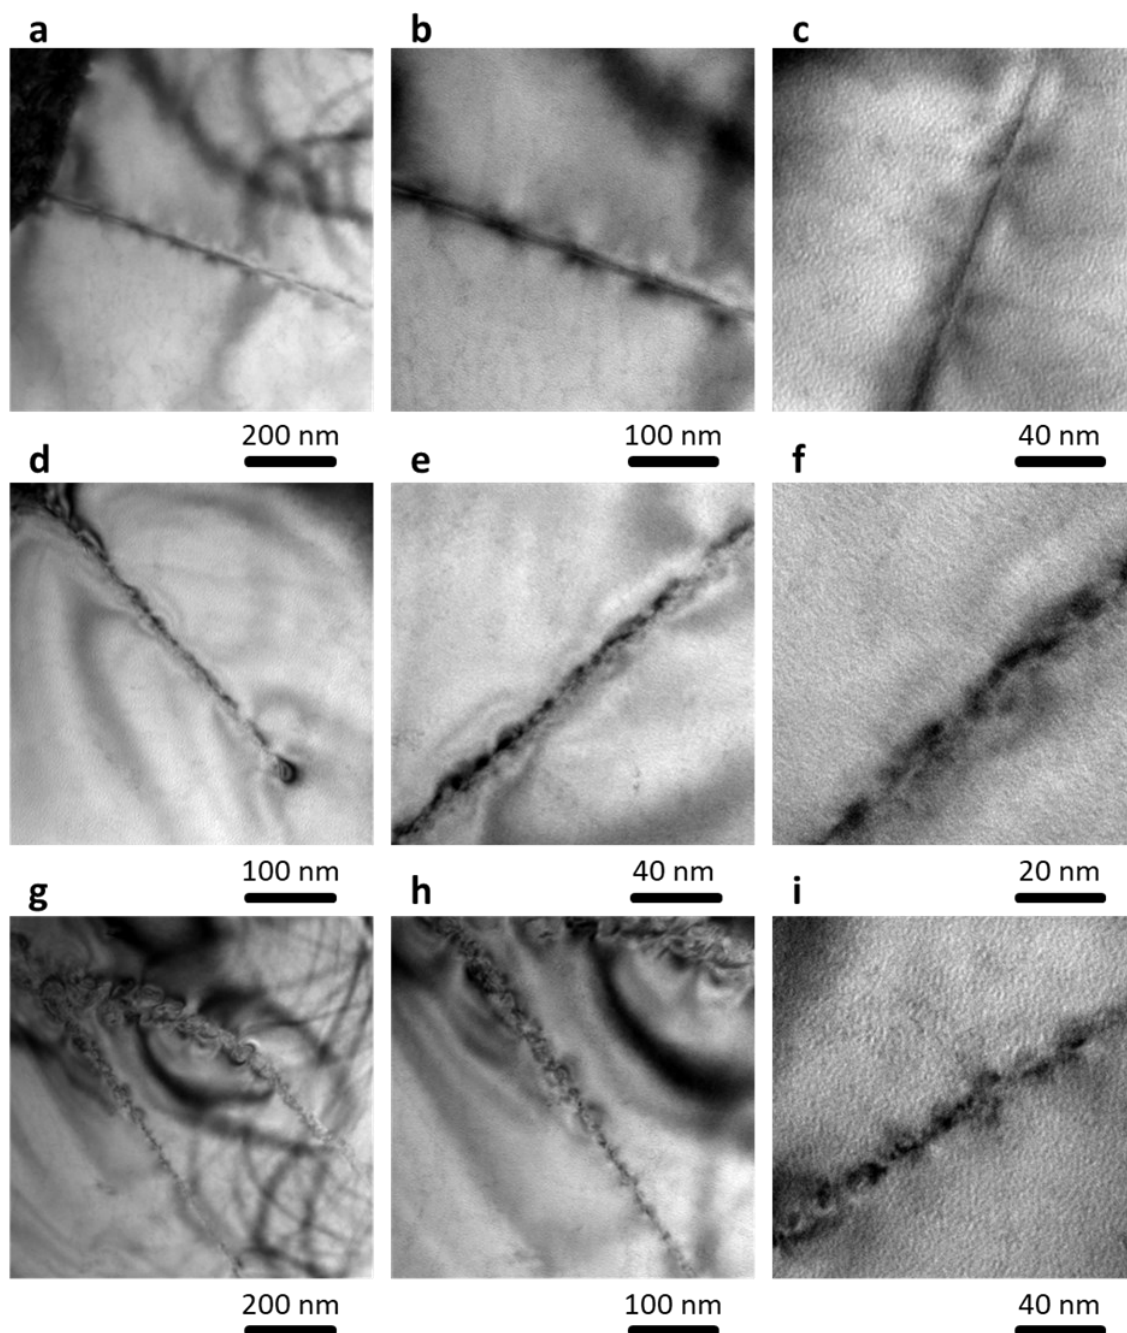

**Supplementary Fig. 14 | Microstructure evolution of the dual-phase alloy (ZTE composition).** **a-c**, Different stacking faults observed in the L phase at 5% strain ( $\epsilon$ ). This indicates that stacking faults are the main deformation mechanism in the initial stage of L-phase plastic deformation. **d-f**, Dual-phase interface structures at 15% strain ( $\epsilon$ ). The microcracks in the L phase are hindered from propagating to the interface.

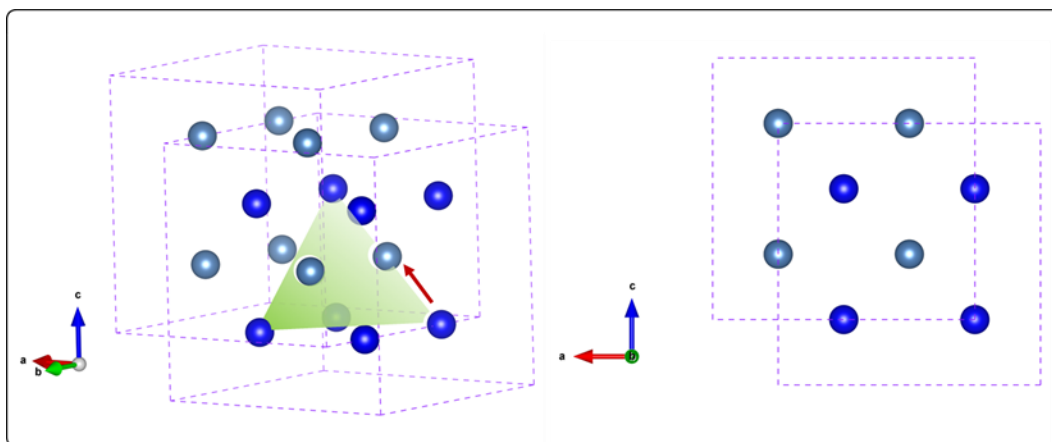

**Supplementary Fig. 15 | The evolution of stacking fault illustrated by the crystal structure.**  
To make the model clearer, we only keep La atoms here.

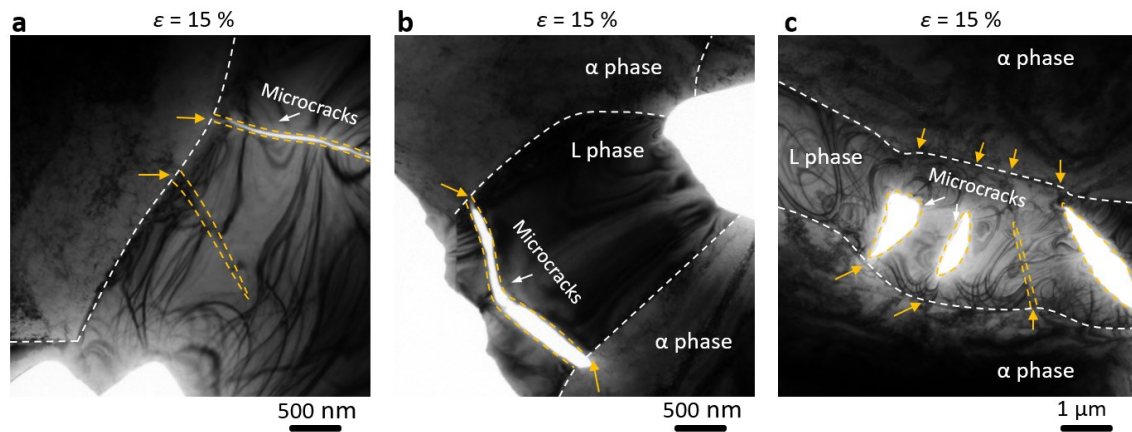

**Supplementary Fig. 16 | a-c, Dual-phase interface structures at 15% strain ( $\epsilon$ ).** The microcracks in the L phase are hindered from propagating to the interface. Noted: The cracks were affected by the thinning process. Noted: The structure of the cracks is affected to varying degrees by the thinning process.

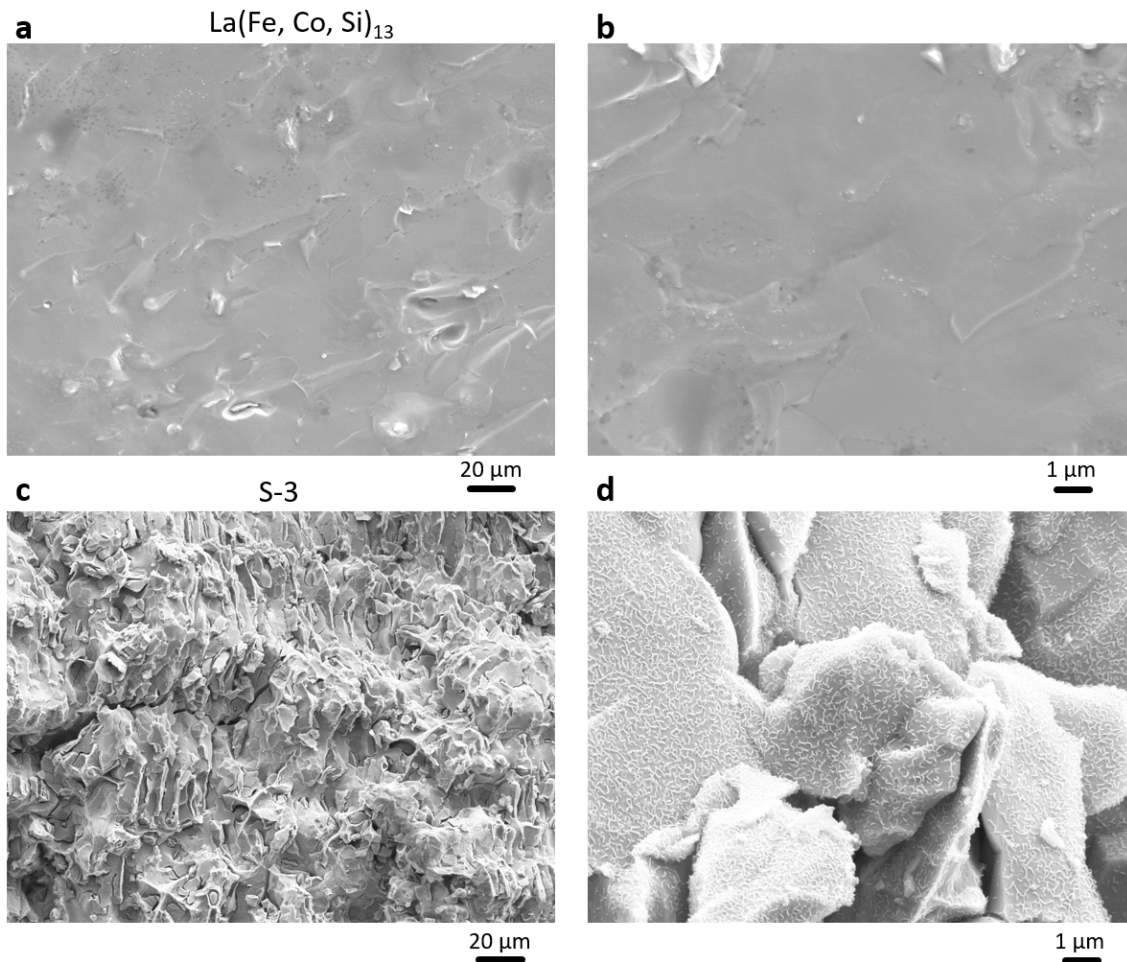

**Supplementary Fig. 17 | a-d,** Fracture morphology of the S-3 and pure  $\text{La}(\text{Fe, Co, Si})_{13}$  compound, dense and cross stripes demonstrated the large plastic deformation before failure.

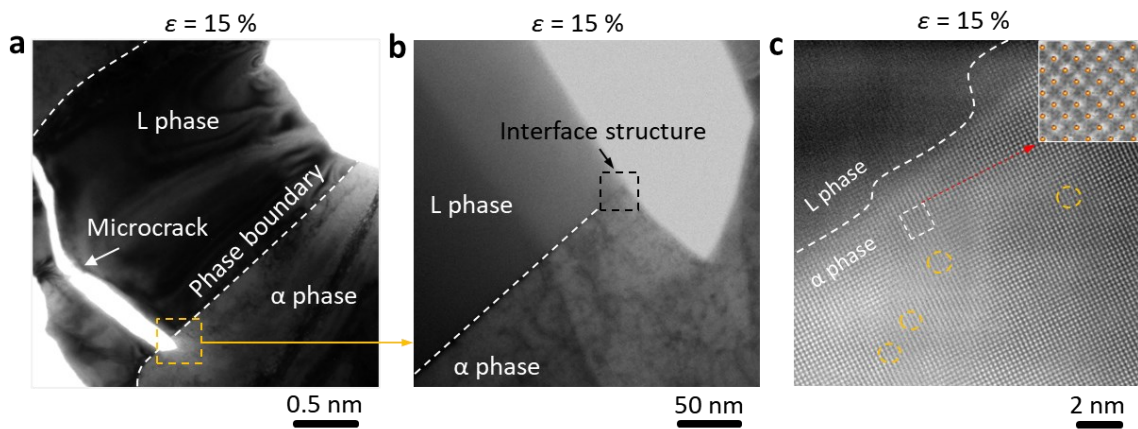

**Supplementary Fig. 18 | A typical interface of the dual-phase alloy (ZTE composition) at 15 % strain ( $\epsilon$ ). a-c, The interface structure of the dual-phase alloy is determined by TEM at different scales.**

## Supplementary References

1. Song, Y., *et al.* Zero thermal expansion in magnetic and metallic Tb(Co,Fe)<sub>2</sub> intermetallic compounds. *J. Am. Chem. Soc.* **140**, 602-605 (2018).
2. Dan, S., *et al.* Zero thermal expansion with high Curie temperature in Ho<sub>2</sub>Fe<sub>16</sub>Cr alloy. *RSC Adv.* **6**, 94809-94814 (2016).
3. Zhao, Y., *et al.* Giant negative thermal expansion in bonded MnCoGe-based compounds with Ni<sub>2</sub>In-type hexagonal structure. *J. Am. Chem. Soc.* **137**, 1746-1749 (2015).
4. Li, S., *et al.* Zero thermal expansion achieved by an electrolytic hydriding method in La(Fe,Si)<sub>13</sub> Compounds. *Adv. Funct. Mater.* **27**, 1604195 (2017).
5. Song, X., *et al.* Adjustable zero thermal expansion in antiperovskite manganese nitride. *Adv. Mater.* **23**, 4690-4694 (2011).
6. Li, L., *et al.* Good comprehensive performance of Laves phase Hf<sub>1-x</sub>Ta<sub>x</sub>Fe<sub>2</sub> as negative thermal expansion materials. *Acta Mater.* **161**, 258-265 (2018).
7. Song, Y., *et al.* Opposite thermal expansion in isostructural noncollinear antiferromagnetic compounds of Mn<sub>3</sub>A (A = Ge and Sn). *Chem. Mater.* **30**, 6236-6241 (2018).
8. Yu, C., *et al.* Plastic and low-cost axial zero thermal expansion alloy by a natural dual-phase composite. *Nat. Commun.* **12**, 4701 (2021).
9. Hu, J., *et al.* Adjustable magnetic phase transition inducing unusual zero thermal expansion in cubic RCo<sub>2</sub>-based intermetallic compounds (R = Rare Earth). *Inorg. Chem.* **58**, 5401-5405 (2019).
10. Wang, J., *et al.* Balancing negative and positive thermal expansion effect in dual-phase La(Fe,Si)<sub>13</sub>/α-Fe in-situ composite with improved compressive strength. *J. Alloy Compd.* **769**, 233-238 (2018).
11. Liu, J., *et al.* Realization of zero thermal expansion in La(Fe,Si)<sub>13</sub> -based system with high mechanical stability. *Mater. Design.* **148**, 71-77 (2018).
12. Pang, X., *et al.* Design of zero thermal expansion and high thermal conductivity in machinable xLFCS/Cu metal matrix composites. *Compos. Part B-Eng.* **238**, 109883 (2022).
13. Zhou, H., *et al.* Tunable negative thermal expansion in La(Fe, Si)<sub>13</sub>/resin composites with high mechanical property and long-term cycle stability. *Microst.* **2**, 1-15 (2022).
14. Cao, Y., *et al.* Ultrawide temperature range super-Invar behavior of R<sub>2</sub>(Fe,Co)<sub>17</sub> materials (R = Rare Earth). *Phys. Rev. Lett.* **127**, 055501 (2021).
15. Lin, K., *et al.* High performance and low thermal expansion in Er-Fe-V-Mo dual-phase alloys. *Acta Mater.* **198**, 271-280 (2020).
16. Huang, R., *et al.* Giant negative thermal expansion in NaZn<sub>13</sub>-type La(Fe, Si, Co)<sub>13</sub> compounds. *J. Am. Chem. Soc.* **135**, 11469-11472 (2013).
